# Supplementary material for: Novel Linear Peptides with High Affinity to αvβ3 Integrin for Precise Tumor Identification
Source: PubMed Central journal article supplement — Theranostics. 2017 Apr 6;7(6):1511–23. doi: 10.7150/thno.18401 (PMC5436510; doi:10.7150/thno.18401), 2017-04-06
Supplement: thnov07p1511s1.pdf [file thnov07p1511s1.pdf]

## Supplementary Information

### Novel linear peptides with high affinity to $\alpha v\beta 3$ integrin for precise tumor identification

Yi Ma, Guanhua Ai, Congying Zhang, Menglu Zhao, Xue Dong, Zhihao Han, Zhaohui Wang, Min Zhang, Yuxi Liu, Weidong Gao, Siwen Li, and Yueqing Gu

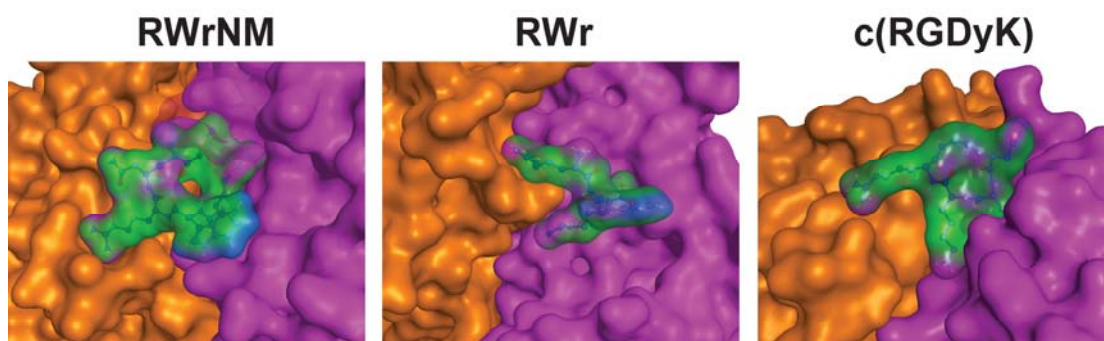

**Supplementary Figure S1.** 3D view of the stable conformation between peptide and integrin  $\alpha v\beta 3$  after 20 ns dynamic simulation. ( $\alpha$  domain: yellow;  $\beta 3$  domain: purple; peptides: green)

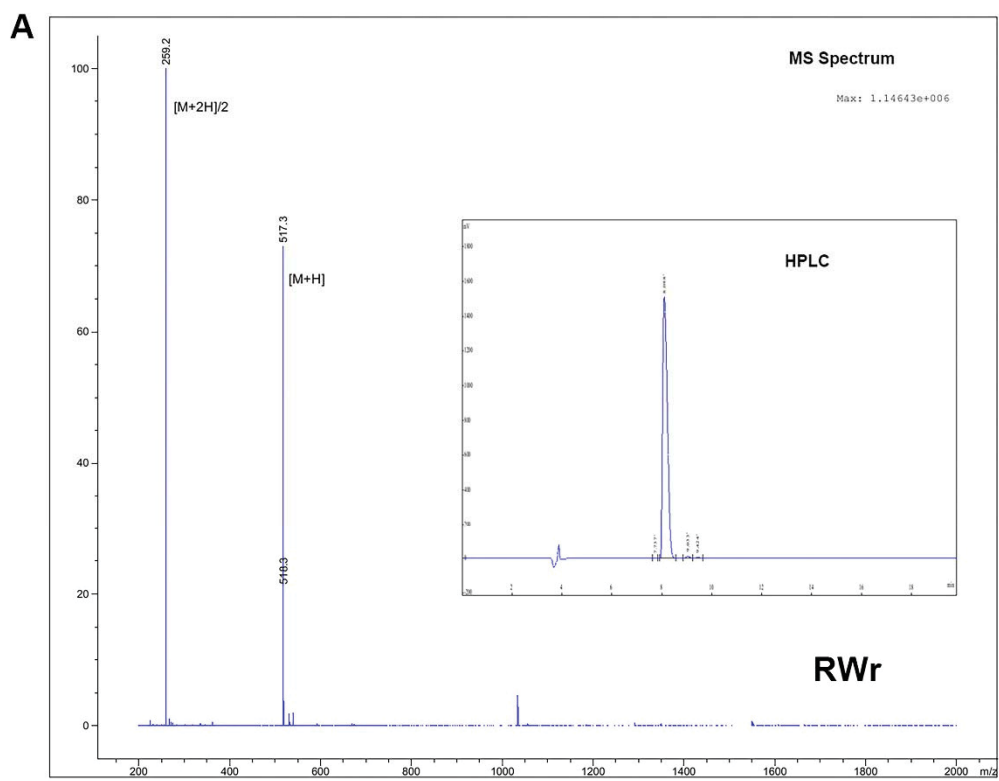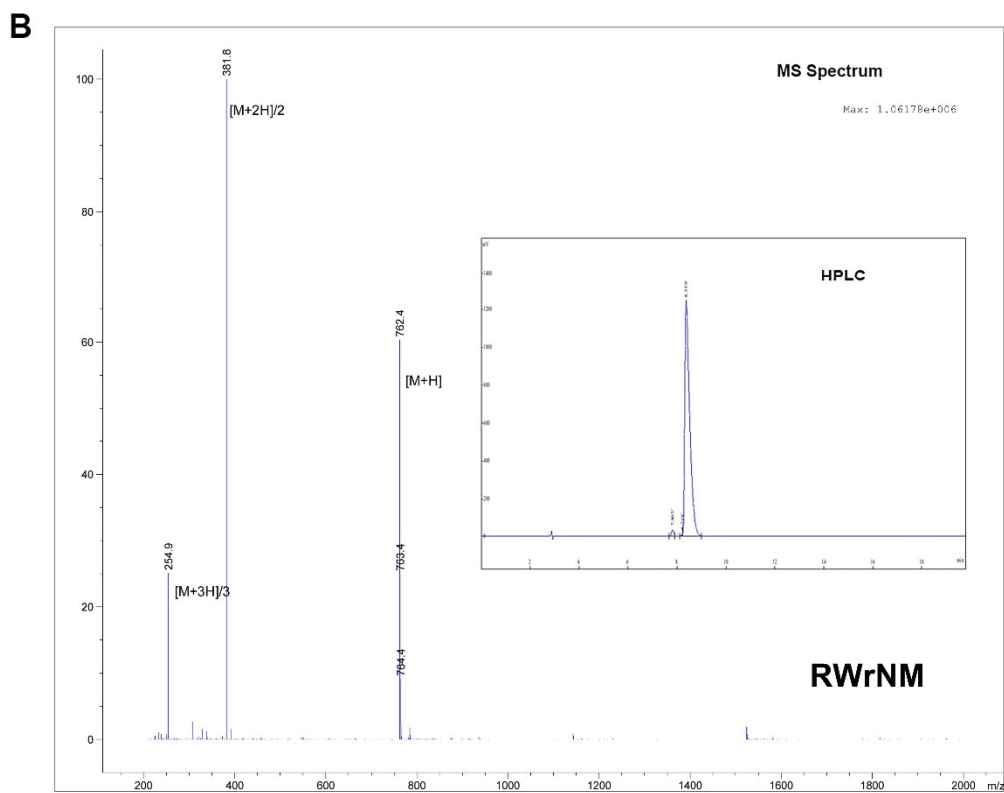

**Supplementary Figure S2.** Mass spectrum and high performance liquid chromatography of synthesized peptides (RWr (A) and RWrNM (B)). The molecular weight of RWr was 516.5 and the purity was up to 98.79%. The molecular weight of RWrNM was 761.91 and the purity was up to 99.39%.

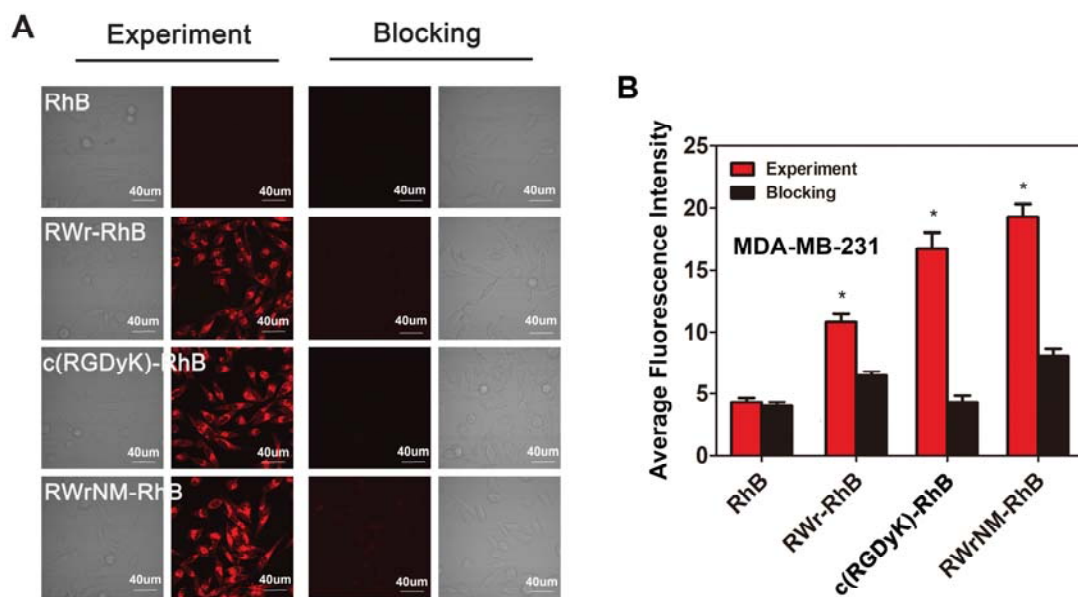

**Supplementary Figure S3.** Targeting ability of the peptides in MDA-MB-231 cells. (A) Laser confocal imaging of cellular uptake of the peptides conjugated with RhB and the cellular uptake after c(RGDyK) blocking. (B) Comparison of average fluorescent intensity in MDA-MB-231 cells in the experiment and blocking groups.

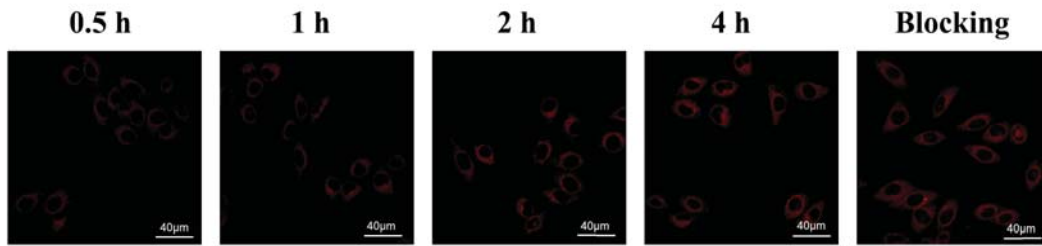

**Supplementary Figure S4.** Time course of the cellular uptake of negative control peptide (NWMrR) in U87MG cells, and the cellular uptake of the negative control peptide after c(RGDyK) blocking. Scale bar: 40  $\mu\text{m}$

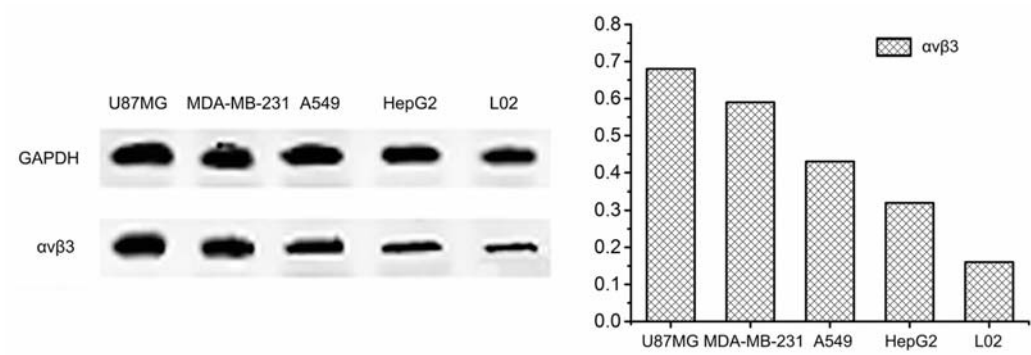

**Supplementary Figure S5.** The relative  $\alpha\beta3$  integrin expression in U87MG, MDA-MB-231, A549, HepG2 and L02 cells by western blot.

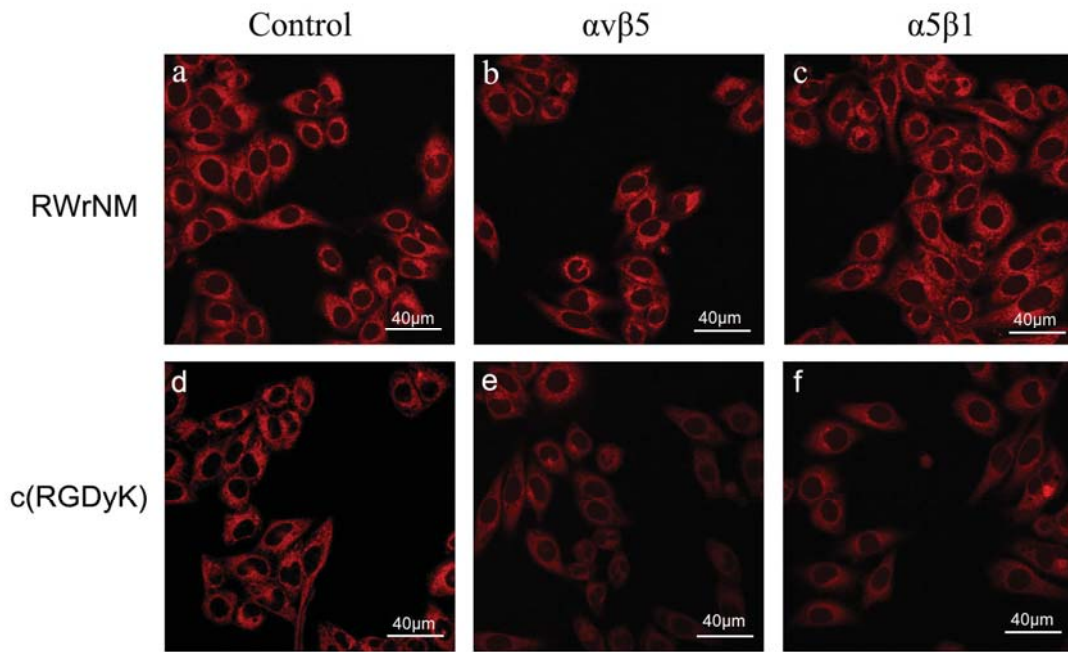

**Supplementary Figure S6.** The cellular uptake of RWrNM in (a) U87MG cells, (b) U87MG cells pre-incubated with mAbs against  $\alpha v \beta 5$  and (c) U87MG cells pre-incubated with mAbs against  $\alpha 5 \beta 1$ ; The cellular uptake of c(RGDyK) in (d) U87MG cells, (e) U87MG cells pre-incubated with mAbs against  $\alpha v \beta 5$  and (f) U87MG cells pre-incubated with mAbs against  $\alpha 5 \beta 1$ .

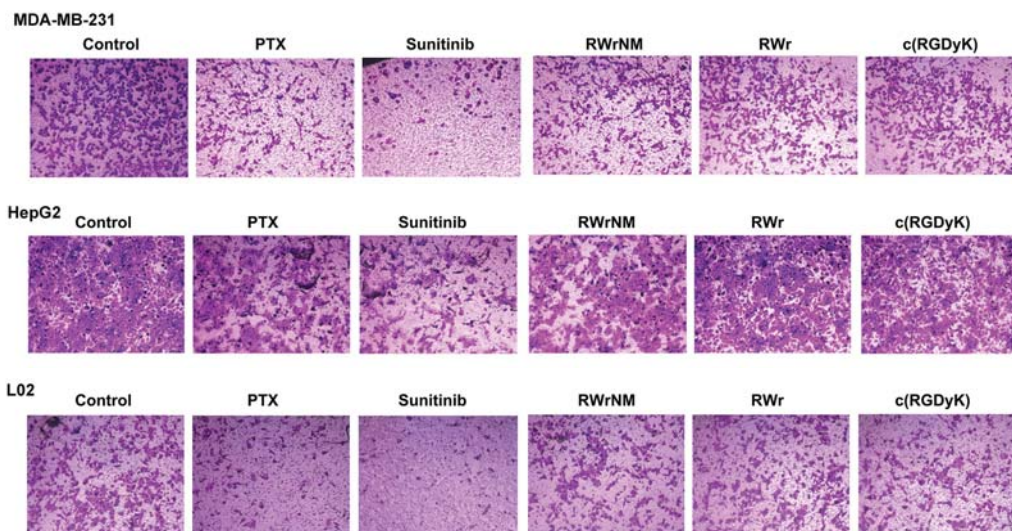

**Supplementary Figure S7.** Inhibition effects of RWrNM, RWr, c(RGDyK) peptides, PTX and Sunitinib on the migration of MDA-MB-231, HepG2 and L02 cells, respectively.

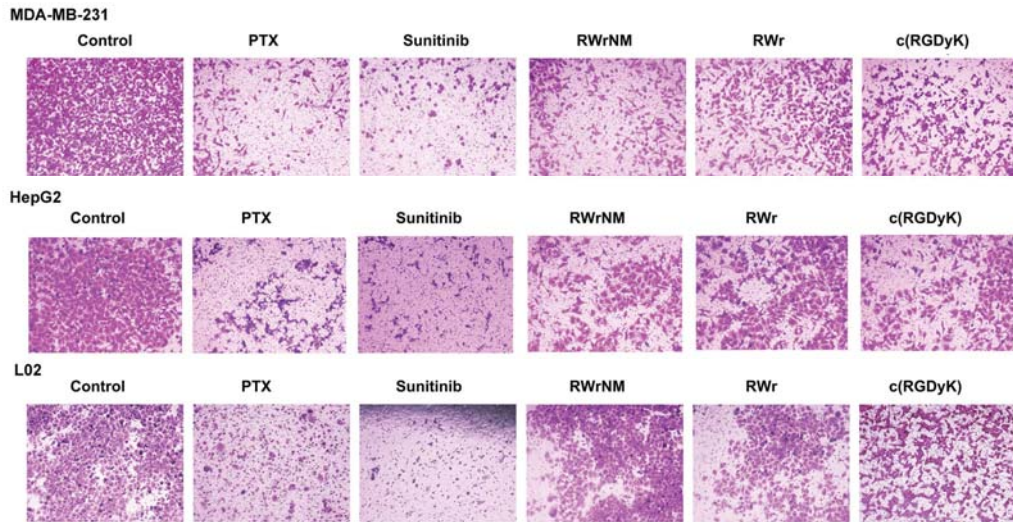

**Supplementary Figure S8.** Inhibition effects of RWrNM, RWr, c(RGDyK) peptides, PTX and Sunitinib on the invasion of MDA-MB-231, HepG2 and L02 cells, respectively.



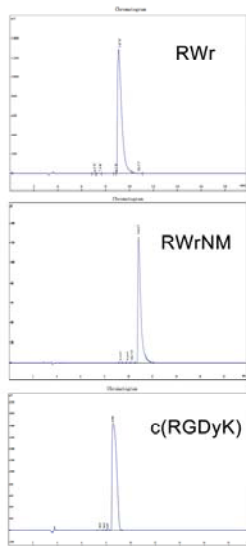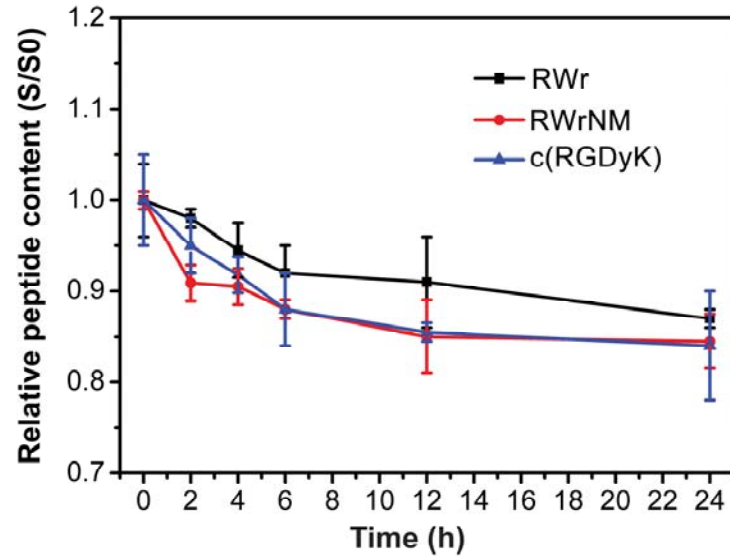

**Supplementary Figure S9.** Serum stability of the three peptides (RWr, RWrNM and c(RGDyK)) in 24 hours examined by liquid chromatography. Mobile phases: Buffer A:0.1% TFA in 100% water(v/v), Buffer B:0.1% TFA in 80% acetonitrile + 20% water(v/v). The gradients of Buffer B in 20 minutes: 25-45% (RWr), 30-50% (RWrNM) and 49-69% (c(RGDyK)). Retention time: 9.076 minutes (RWr), 10.827 minutes (RWrNM) and 8.537 minutes (c(RGDyK)).

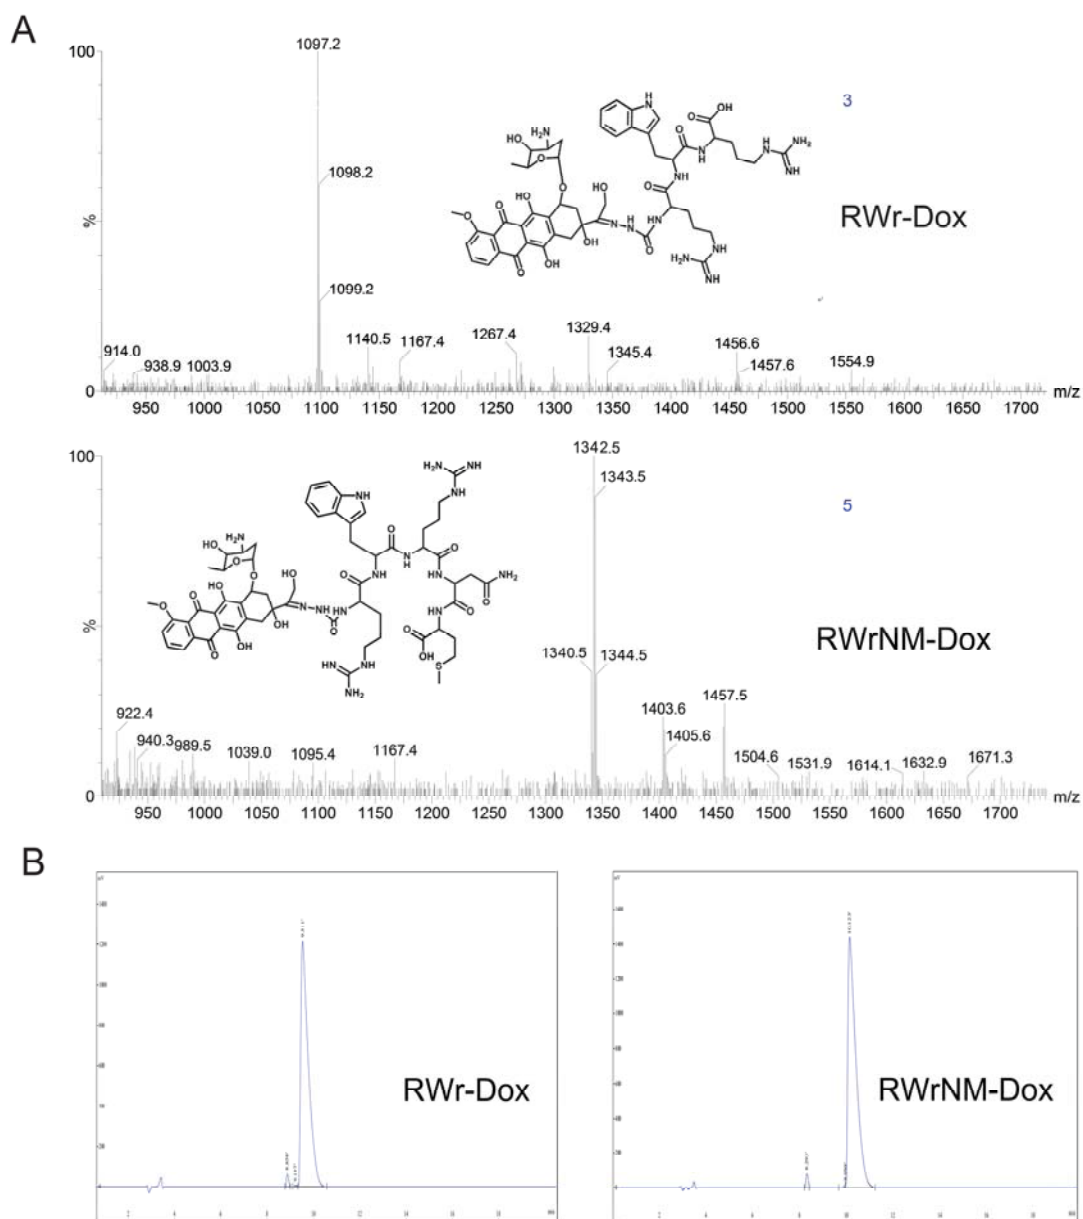

**Supplementary Figure S10.** Mass spectrum (A) and high performance liquid chromatography (B) of peptide-Dox conjugation.

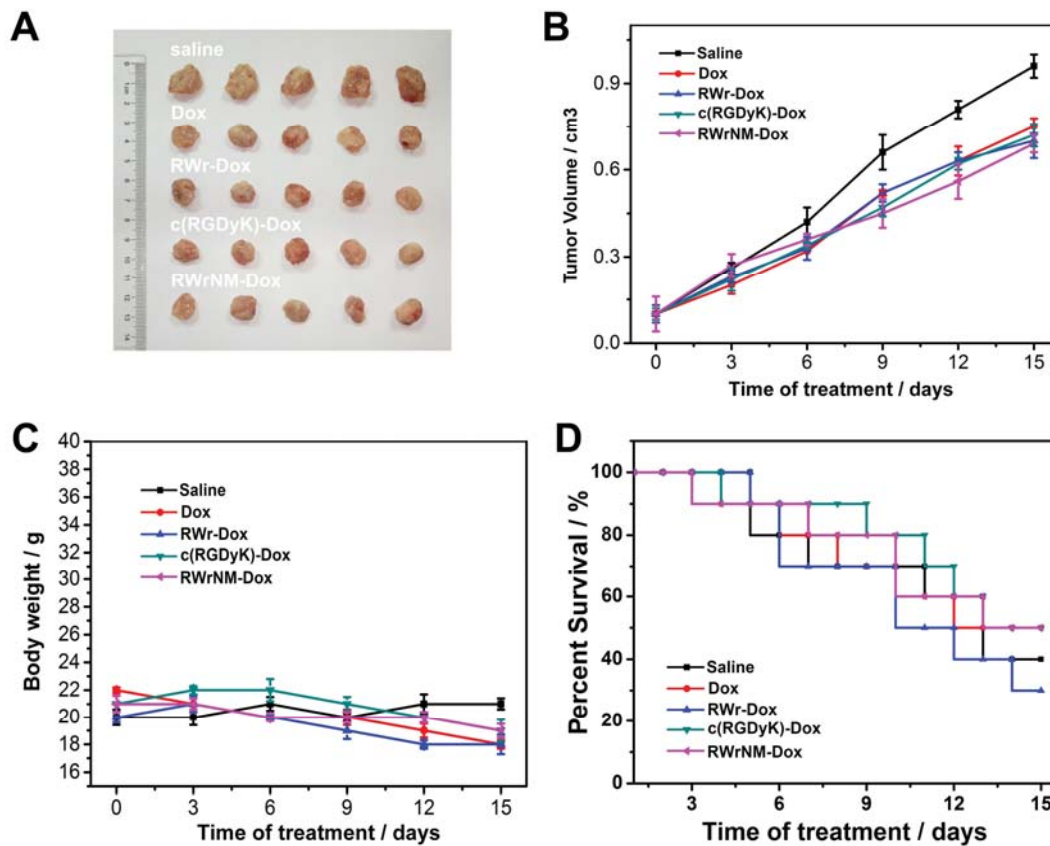

**Supplementary Figure S11.** Antitumor efficacy of RWr, c(RGDyK) and RWrNM conjugated with Dox on HepG2-tumor-bearing mice. (A) Images of the tumors in different treatment groups obtained after the 15-days therapy. (B) Tumor growth curves of the HepG2-tumor-bearing mice after intravenous injection with saline, Dox, RWr-Dox, c(RGDyK)-Dox and RWrNM-Dox. (C) Body weight of mice during different peptide-Dox treatments in 15 days. (D) Survival rate of mice in different peptide-Dox treatment groups.

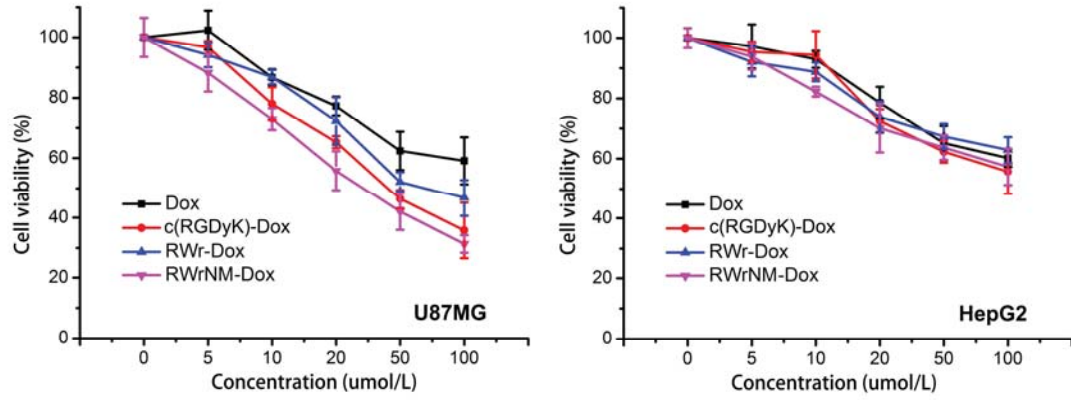

**Supplementary Figure S12.** In vitro cytotoxicity of Dox, c(RGDyK)-Dox, RWr-Dox and RWrNM-Dox toward U87MG cells and HepG2 cells. Data points represent mean  $\pm$  SD (n=6).
